1 *Feasibility of individualized home exercise programs for patients with head and neck cancer – study*  
2 *protocol and first results of a multicentre single-arm intervention trial (OSHO #94)*

3  
4 Sabine Felser<sup>1\*</sup>, Julia Rogahn<sup>1</sup>, Anne Glass<sup>2</sup>, Lars Arne Bonke<sup>1</sup>, Daniel F. Strüder<sup>3</sup>, Jana Stolle<sup>4</sup>,  
5 Susann Schulze<sup>4,5</sup>, Markus Blaurock<sup>6</sup>, Ursula Kriesen<sup>1</sup>, Christian Junghans<sup>1</sup>, Christina Grosse-Thie<sup>1,7</sup>

6  
7 <sup>1</sup> Department of Internal Medicine, Clinic III – Hematology, Oncology and Palliative Care, Rostock  
8 University Medical Center, Rostock, Germany

9  
10 <sup>2</sup> Institute of Biostatistics and Informatics in Medicine, Rostock University Medical Center, Rostock,  
11 Germany

12  
13 <sup>3</sup> Department of Otorhinolaryngology, Head and Neck Surgery "Otto Koerner", Rostock University  
14 Medical Center, Rostock, Germany.

15  
16 <sup>4</sup> Krukenberg Cancer Center Halle, University Hospital Halle, Halle (Saale), Germany

17  
18 <sup>5</sup> Department of Internal Medicine, Medical Clinic II, Carl-von-Basedow-Klinikum,  
19 Merseburg, Germany,

20  
21 <sup>6</sup> Department of Otorhinolaryngology, Head and Neck Surgery, University Medicine Greifswald,  
22 Greifswald, Germany

23  
24 <sup>7</sup> Hematology and Oncology Practice, Rostock, Germany

25  
26  
27 \* Corresponding author

28 e-mail address: [sabine.felser@med.uni-rostock.de](mailto:sabine.felser@med.uni-rostock.de) (SF)

# 1 Abstract

2 **Introduction** Patients with head and neck cancer (PwHNC) benefit from targeted exercise  
3 interventions: symptom relief, compensation for dysfunction, improvement in quality of life (QoL). Data  
4 on acceptance physical interventions in PwHNC are rare. The ‘OSHO #94’ trial investigates the short-  
5 and medium-term effects of individualized home exercise in PwHNC on QoL, physical activity and  
6 functionality. The study includes a feasibility phase in order to evaluate the acceptance (Phase A),  
7 followed by a consecutive QoL endpoint Phase B. Here we present the study protocol as well as the  
8 feasibility results.

9 **Methods and analysis** This prospective, multicentre, single-arm intervention study includes PwHNC  
10  $\geq 18$  years of age in aftercare or palliative care with stable remission under immunotherapy. The study  
11 opened in January 01, 2021, with estimated completion by December 31, 2024. The PwHNC receive an  
12 individualized home exercise program consisting of mobilization, coordination, strengthening and  
13 stretching exercises. This should be carried out at least three times a week over 12 weeks for 15 to 30  
14 minutes, supplemented by aerobic training two to three times a week for 30 minutes (intervention). Once  
15 weekly telephone calls with a physiotherapist are performed. Subsequently, there is a 12-week follow-  
16 up (FU) without exercise specifications/contact. Outcomes are measured before and after the  
17 intervention and following the FU. Primary outcome of the feasibility phase (Phase A,  $n = 25$ ) was the  
18 determination of the dropout rate during the intervention with a termination cut off if more than 30%  
19 PwHNC withdrew premature. The primary outcome of phases A + B ( $N = 53$ ) are the change in global  
20 QoL score from pre- to post-intervention (EORTC QLQ-C30). Secondary outcomes include clinical and  
21 patient-reported measures, training details as well as functional diagnostic data (e.g. level of physical  
22 activity, training frequency, flexibility, fall risk and aerobic performance).

23 **Results** 25 PwHNC were enrolled onto the feasibility cohort. Only 16% (4/25 patients) did not complete  
24 the study. Therefore, individualized home exercise programs in PwHNC seem feasible recruitment of  
25 PwHNC for phase B continued. The dropout rate was adjusted from 30% ( $N = 60$ ) to 20% ( $N = 53$ ,  
26 calculated sample size  $n = 42$  PwHNC and 20% ( $n = 11$ ) to dropout).

- 1 **Ethics and dissemination** The study protocol was approved by the Ethics Committee of the University
- 2 of Rostock, University of Halle-Wittenberg and University of Greifswald. The findings will be
- 3 disseminated in peer-reviewed journals and academic conferences.
- 4 **Trial registration** German Registry of Clinical Trials DRKS00023883.

## 1 Introduction

2 Head and neck cancer (HNC) comprises various types of cancer that occur in the head and neck area,  
3 including malignant neoplasms of the oral cavity, pharynx, larynx, nose and paranasal sinuses. Many  
4 patients with HNC (PwHNC) have clinically relevant functional deficits, often in the areas of food-  
5 intake, breathing, speech, pain, mood and neck and shoulder mobility, due to the location of the tumours  
6 and intensive local therapy procedures (1–4), e.g. operation and/or radiotherapy. In addition, there may  
7 be visible disfigurements in the face and neck area, weight loss and sarcopenia (5), body image  
8 disturbance (6) or other symptoms such as fatigue. These acute and sometimes chronic disease- and  
9 therapy-related functional deficits and side effects often impair the health-related quality of life (QoL)  
10 of those affected (5–9). Recent advances in the diagnosis and treatment of PwHNC have significantly  
11 improved the survival of PwHNC (10). As a result, there are more long-term survivors (11), and,  
12 especially under new approaches such as immunotherapy (ICT-immune-checkpoint therapy), a small  
13 group of PwHNC can reach stable remissions even in a primary incurable situation (12). Therefore,  
14 other dimensions of the treatment outcome, such as physical status and functional abilities,  
15 psychological status and wellbeing, are becoming increasingly important (13). Consequently, the  
16 treatment of functional deficits and the improvement of QoL is an essential task in the context of  
17 interdisciplinary rehabilitation of PwHNC (1, 2).

18 The most commonly used supportive interventions in HNC survivors to date have focused on  
19 monitoring/treatment of physical effects (14). Physical exercise is a feasible, safe and promising  
20 approach to improve QoL in HNC survivors. In particular, 12-week training programs with aerobic  
21 activity (walking) or progressive resistance training for the whole body showed great benefit for  
22 improving QoL perception in HNC survivors (15). In addition, reviews and meta-analyses indicate that  
23 PwHNC benefit from exercise interventions during and after medical therapy in terms of physical  
24 functionality (muscle strength, cardiorespiratory fitness, flexibility), (shoulder) pain reduction and  
25 fatigue relief. The effects described with regard to body composition are heterogeneous (16–19).  
26 Consequently, the American Head and Neck Society's 2022 statement on exercise therapy calls for,  
27 among other things, 1. early screening of PwHNC for rehabilitation needs using, 2. objective  
28 assessments, 3. referral of PwHNC to qualified therapists, and 4. motivating and encouraging PwHNC

1 to engage in regular physical activity (20). The fact that particular attention should be paid to the latter  
2 point is illustrated by study results from Taiwan and Sweden, which show that PwHNC are insufficiently  
3 physically active (21, 22). According to the results of Fang et al. (21), only 17% of 108 HNC survivors  
4 met the WHO criteria for physical activity. Those reported less fatigue and better QoL compared to  
5 PwHNC who did not meet the criteria. Regardless, the PwHNC had poorer overall physical fitness  
6 compared to results from normative data of subjects from Taiwanese work fitness measurements.  
7 Reviews of the barriers revealed that in addition to physical problems, time pressure, lack of motivation,  
8 and lack of knowledge are the main reasons for insufficient physical activity in PwHNC (23, 24). The  
9 results also revealed that the exercise preferences of the PwHNC differ in terms of type, location,  
10 company, intensity, frequency and supervision. It is known from surveys in England, the US Midwest  
11 and Canada that PwHNC prefer (un)supervised exercise programs, alone or with family members, at  
12 moderate intensity, at home or outdoors at different times (25–27). To summarize the current findings,  
13 it can be concluded that individual exercise programs that can be carried out flexibly at home and/or  
14 outdoors are an optimal approach to motivate PwHNC to be more physically active. However, this  
15 approach has not yet been sufficiently investigated. In addition, there is little knowledge about the  
16 sustainability of (home) training interventions in PwHNC.  
17 As a result, our goal is to develop an exercise program that can be carried out 100% independently and  
18 flexibly by PwHNC at home or outdoors. This exercise program should be designed in a way that it can  
19 be flexibly adapted to the individual needs of PwHNC. The short and medium-term effects on QoL, the  
20 level of physical activity, physical functionality and body composition will be investigated. Here we  
21 present the study protocol and the results of the feasibility study.

22

## 23 **Methods and Analysis**

### 24 **Study design and, primary and secondary outcomes**

25 OSO #94 is a prospective, multicentre, single-arm, intervention trial conducted by the Department of  
26 Haematology, Oncology and Palliative Care of Rostock University Medical Centre (clinic III, UMR,  
27 Germany) in adult PwHNC.

1 The study consists of two phases, A and B. Phase A examines the feasibility of the study design  
2 including the estimation of the dropout rate during the intervention. Further phase A outcomes are  
3 compliance with the training recommendations, the number of adverse events associated with the  
4 training, satisfaction with the training information, use of the exercise materials and the influence of  
5 weekly telephone calls during the intervention on the motivation to train. Once phase A has been  
6 successfully completed, which involves a maximum dropout rate of 30%, the study was supposed to  
7 automatically enter Phase B. Otherwise, it was planned to modify the study design.

8 In Phase B, the short- and medium-term effects of the intervention on QoL will be investigated. We  
9 hypothesize that the primary outcome ‘global QoL score’ will increase significantly after a 12-week  
10 guided training intervention in the home-based setting. Secondary outcomes are the level of physical  
11 activity, physical function and body composition.

12

## 13 **Recruitment, and inclusion and exclusion criteria**

14 Recruitment started on January 1, 2021 at the UMR in cooperation with the Department of  
15 Otorhinolaryngology, Head and Neck Surgery ‘Otto Koerner’. The Krukenberg Cancer Centre Halle of  
16 the University Hospital Halle has been recruiting since September 20, 2022 and the Department of  
17 Otorhinolaryngology, Head and Neck Surgery at the University Medicine Greifswald since March 1,  
18 2023. The study team is supported in the application/recruitment process by the self-help network Kopf-  
19 Hals-M.U.N.D.-Krebs e. V. Recruitment should be completed on December 31, 2024.

20 Patients must meet all of the following inclusion criteria: age  $\geq 18$  years, a final coded diagnosis  
21 according to ICD: C00-C14, C30-C32 (HNC) in aftercare (after antineoplastic therapy or after  
22 completion of rehabilitation, if planned) or with stable remission under immunotherapy and medical  
23 clearance of the treating physician, able to walk.

24 The exclusion criteria are inadequate knowledge of the German language, consent not given, clinically  
25 relevant heart failure (NYHA III and IV), myocardial infarction within the last 4 weeks, unstable angina  
26 pectoris, higher-grade valvular vitia, uncontrolled cardiac arrhythmias, chronic obstructive pulmonary  
27 disease (GOLD III and IV), peripheral arterial occlusive disease ( $\geq$ Stage III according to Fontaine),  
28 diseases that could seriously impair cognitive performance (e.g. dementia, stroke, Wernicke-Korsakoff

1 syndrome), known alcohol dependency and score <24 points on the Mini-Mental State Examination  
2 (MMSE).

3

#### 4 **Preliminary work: conception of a home exercise program for PwHNC**

5 In an initial study conducted in 2018/19 at UMR's Clinic III, a training program with exercises for  
6 PwHNC suitable for independent training at home was developed. Afterwards, this training program  
7 was evaluated by means of a 12-week training intervention in a group setting with regard to feasibility  
8 (dropout, adherence) and the effects on physical functionality and QoL in a pilot cohort (28). The low  
9 dropout rate (17%), the good adherence of the participants (83%) and the positive effects in terms of  
10 physical functionality and QoL provided an excellent basis for transferring the training program to home  
11 exercise. In preparation for this, an "Exercise manual for patients with mouth, jaw, face and throat  
12 tumours" was drafted containing a total of 90 mobilization, coordination, strengthening and stretching  
13 exercises for training at home (29). Video clips for these 90 exercises were created in line with the book  
14 and supplemented with four exercise videos with the following content: (1.) Functional gymnastics &  
15 balance, time approx. 20 min, (2.) Coordination training, time approx. 12 min, (3.) Mobilization,  
16 coordination and strength training with exercise ball, time approx. 22 min, (4.) Training of the shoulder  
17 and neck region, time approx. 30 min.

18

#### 19 **Study procedure**

##### 20 **Fig 2. Study procedure OSHO #94**

21 The study procedure is shown schematically in Fig 2. Screening of outpatients who come to the  
22 consultation is carried out locally at the recruiting study centres. Potential study patients are approached  
23 directly by the study team and informed about the study. PwHNC who have become aware of the study  
24 through the self-help network Kopf-Hals-M.U.N.D.-Krebs e. V. or through flyers can also contact the  
25 study centres. If the patient meets the inclusion criteria without any exclusion criteria, the patient is  
26 informed by a physician or sports scientist/physiotherapist. Following written consent by the patient, the  
27 pre-examination is administered. Based on the results of this examination and the objectives of the  
28 PwHNC, the therapists create an individual training plan. Depending on the patients' place of residence,

1 time and state of health, they will be introduced to the training program following the pre-examination  
2 or at a separate appointment within the next two weeks. Study patients receive the above-mentioned  
3 exercise manual for training at home. In this manual, the exercises recommended by the therapists are  
4 marked with a green sticky dot, and contraindicated exercises are marked with a red sticky dot. If the  
5 patients have the appropriate technology (e.g. PC) and wish to do so, the therapists put the recommended  
6 exercises together in a video clip. These are stored together with selected exercise programs, the four  
7 mentioned above, on a USB stick and given to the patients. Patients also receive a free elastic band for  
8 strengthening exercises and an inflatable exercise ball (Ø 22 cm) for coordination and strengthening  
9 exercises at home. The 12-week individual home exercise program starts immediately after admission.  
10 During the 12-week intervention, the therapists contact the patients by telephone once a week. In a  
11 telephone protocol, they record the training completed (type, frequency and time), adverse events  
12 associated with the training, the patient's motivation to train and the current well-being of the PwHNC.  
13 Any questions the patients may have about the training are answered and, if necessary, further training  
14 tips are given. Patients who end the intervention prematurely are asked to state the reason for doing so.  
15 In addition to the telephone protocol, patients are asked to keep a training diary for the whole  
16 intervention period. Following the 12-week home exercise program, the post-examination takes place.  
17 After the post-examination, the patients are left to their own resources on the assumption that they can  
18 carry out the exercise program or other physical activities on their own without further instruction (=   
19 Follow up, FU). After a further 12 weeks, an FU-examination is carried out in order to be able to make  
20 statements about the medium-term effects of the home exercise intervention.

21

## 22 **Exercise recommendations**

23 The training recommendations include completion of the individual exercise program or alternatively  
24 one of the four exercise videos on at least 3 days per week for 15–30 minutes. The individual training  
25 programs consist of a selection of 15–25 exercises. Depending on the participant's current fitness level  
26 and needs, it includes a different number of mobilization, coordination, strengthening and stretching  
27 exercises. The recommended duration of each exercise varies between 30 and 60 seconds and from 1 to  
28 3 repetitions/sets. In addition, endurance training, e. g. (Nordic) walking, cycling, swimming, dancing



1 or similar, is recommended at a frequency of 2 to 3 times a week for 30 minutes each time. The training  
2 intensity is controlled using the 15-point BORG rating of perceived exertion scale (30), and the  
3 recommended range is between 11 (fairly easy) and 15 (hard).

4

## 5 **Outcome measures**

6 The data collection schedule is shown in Table 1.

7 *Disease-specific data* (tumour location, cancer stage, date of diagnosis, previous medical treatments and  
8 current therapy phase) on the study patients are recorded once by the treating/including physicians at  
9 the time of study inclusion.

10 At the three examination appointments – pre (week 0), post (week 12 to a maximum of 16) and FU  
11 (week 24 to a maximum of 30) – patient-reported outcomes (PROs) are recorded, and a physical function  
12 diagnostic is carried out. The assessment consists of the following measures:

13

14 Patient-reported:

15 a. *Sociodemographic data* (age, sex, height, weight, marital status, educational level, professional  
16 status), and *lifestyle factors* (tobacco and alcohol consumption, sports history) are recorded using  
17 an initial questionnaire. The body mass index (BMI) is calculated (body weight [kg]/height [m<sup>2</sup>]).

18 b. *QoL* is measured using two established questionnaires: (1) EORTC QLQ-C30 version 3.0  
19 questionnaire and (2) the QLQ-HN35 head and neck-specific questionnaire (31). The EORTC  
20 QLQ-C30 is a 30-item cancer-specific questionnaire that has a global QoL scale, 5 functional scales,  
21 3 symptom scales and 6 single items. EORTC QLQ-HN35 is a 35-item module. It contains 7  
22 symptom scales and 6 symptom items. Each scale results in an average score of 0 to 100. A high  
23 value on the scale ‘global QoL’ and on the functional scales means a high degree of subjectively  
24 perceived health and a high assessment of the QoL or a high degree of performance and function.  
25 A high value in the symptom scales correlates with a high degree of complaints and symptoms (32–  
26 34). No threshold values were set in advance to assess the clinically important difference. The  
27 primary outcome is determined by comparing the global QoL score pre- and post-intervention.

1 c. *Level of physical activity* is assessed using the Godin-Shephard Leisure-Time Physical Activity  
2 Questionnaire (GSLTPAQ) (35, 36). The GSLTPAQ is a 4-item self-administered questionnaire.  
3 The first three questions seek information on the number of times one engages in mild, moderate  
4 and strenuous physical activity bouts of at least 15 min duration in a typical week (37). Scores  
5 derived from the GSLTPAQ include total weekly leisure-time physical activity, called a Leisure  
6 Score Index (LSI), in which number of bouts at each intensity is multiplied by 3, 5 and 9 metabolic  
7 equivalents and summed. LSI scores can be used for ranking individuals from the lowest to highest  
8 physical activity levels (38).

9 d. *Assessment of the intervention and support* is carried out in an exit questionnaire. First, the study  
10 participants assess the effects of the intervention on physical performance, well-being, stress, self-  
11 esteem, and mood on a 4-point Likert scale. Second, how difficult it was for the PwHNC to motivate  
12 themselves to train and what influence the weekly physiotherapy phone calls had on their motivation  
13 to train were also recorded on a 4-point Likert scale. Third, it is recorded whether the PwHNC  
14 carried out their training alone or with others (e. g. family members). Fourth, the PwHNC are asked  
15 whether they will maintain the training. Fifth, the PwHNC were asked whether the information they  
16 received about the training was sufficient and, if not, what additional information they would have  
17 liked. Sixth, the PwHNC should indicate whether they used the exercise manual, the videos and the  
18 small equipment provided for their training.

19

20 Physical function diagnostic:

21 Physical function assessments are carried out a maximum of two weeks before the intervention and a  
22 maximum of two weeks after the intervention and the FU. These are performed in the same order. The  
23 aim is for all tests to be carried out at one location by the same investigator. The assessment consists of  
24 the following measures:

25 e. *The flexibility of the temporomandibular joints* is measured using the distance between the incisors  
26 (cm) determined with a ruler at maximum mouth opening.

27 f. *The flexibility of the shoulder joints and the cervical spine* is measured by the active range of motion  
28 (ROM) in the sagittal, frontal, and transversal planes using a manual goniometer. The measurements

- 1 are carried out starting from the maximum ROM away from the body to the end position close to  
2 the body (°).
- 3 g. *The flexibility of the lower back and hamstring muscles* is assessed with the stand and reach test.  
4 Subjects stand with closed/stretched legs and hold one (39) hand covering the other. The trunk is  
5 slowly flexed, and the distance between the hands and the ground (which can be hold for 2 s) is  
6 measured (cm) (39).
- 7 h. *Fall risk* is evaluated by using the short physical performance battery (SPPB). The SPPB has been  
8 shown to have predictive value for the assessment of mortality risk, nursing home admission and  
9 disability (40). The SPPB is a group of measures that combines the results of balance tests, gait  
10 speed and repeated chair stands. The scores range from 0 (worst performance) to 12 (best  
11 performance).
- 12 i. *Aerobic performance* is assessed using the 6-minute walk test (6MWT) (41). The primary measure  
13 is the walk distance (m) achieved within 6 minutes. The test is carried out on a 40-m long straight  
14 track (a mark is placed every 10 m) on solid ground. After the 6MWT, the participants are asked to  
15 rate their perceived exertion (RPE) using the 15-point Borg scale (6 = really, really easy, 20 =  
16 maximum effort) (30) and their exercise-induced pain in the leg muscles using a Category-Ratio  
17 (CR)-10 scale (0 = no pain at all, 10 = extremely intense pain) (42).  
18
- 19 Following completion of the intervention, the telephone protocols and training diaries are evaluated with  
20 regard to the following parameters:
- 21 j. *Compliance with regard to training recommendations*: the documented training sessions are  
22 evaluated with regard to the average weekly training frequency and time, separately for individual  
23 exercise programs and endurance training.
- 24 k. *Adverse events* in connection with the intervention that are mentioned by the participants are  
25 recorded.
- 26 l. *The patients' motivation to train* is recorded over the 12-week intervention using a 4-point Likert  
27 scale (1 = not at all, 4 = very much).
- 28 m. *Weekly well-being* is documented and analysed on a 10-point Likert scale (0 = very poor, 10 = very  
29 good).

1

2 If possible, the reason for dropping out is asked in the event of early termination of studies.

3

1 **Table 1. Data collection schedule**

| <b>Assessments</b>                                                                                                                                                                                                                                                                                                                                                                                           | <b>Pre</b> | <b>Post</b> | <b>FU</b>    |
|--------------------------------------------------------------------------------------------------------------------------------------------------------------------------------------------------------------------------------------------------------------------------------------------------------------------------------------------------------------------------------------------------------------|------------|-------------|--------------|
| <b>Physician</b>                                                                                                                                                                                                                                                                                                                                                                                             |            |             |              |
| Disease-specific data (questionnaire)<br>Tumour location, cancer stage, date of diagnosis, previous medical treatments, current therapy phase                                                                                                                                                                                                                                                                | ✓          |             |              |
| <b>Patient</b>                                                                                                                                                                                                                                                                                                                                                                                               |            |             |              |
| Sociodemographic data and lifestyle factors (initial questionnaire)<br>Age, sex, height, weight, marital status, educational level, professional status, tobacco and alcohol consumption, sports history                                                                                                                                                                                                     | ✓          |             |              |
| Quality of life (QLQ-C30, H&N35)                                                                                                                                                                                                                                                                                                                                                                             | ✓          | ✓           | ✓            |
| Level of physical activity (GSLTPAQ)                                                                                                                                                                                                                                                                                                                                                                         | ✓          | ✓           | ✓            |
| Assessment of the intervention and support (exit questionnaire)<br>Effects of intervention on physical performance, well-being, stress, self-esteem, and mood (4-point Likert scale), motivation to train and influence of weekly telephone calls (4-point Likert scale), training alone or with others, maintaining the training, satisfaction with the training information, use of the materials provided |            | ✓           |              |
| <b>Physical function diagnostic</b>                                                                                                                                                                                                                                                                                                                                                                          |            |             |              |
| Flexibility<br>temporomandibular joints (incisor distance at maximum mouth opening)<br>shoulder joints and cervical spine (active ROM)<br>lower back and hamstring muscles (stand and reach test)                                                                                                                                                                                                            | ✓          | ✓           | ✓            |
| Fall risk (SPPB)                                                                                                                                                                                                                                                                                                                                                                                             | ✓          | ✓           | ✓            |
| Aerobic performance (6MWT)<br>Walk distance, RPE (BORG-scale), exercise-induced pain in the legs (CR-10)                                                                                                                                                                                                                                                                                                     | ✓          | ✓           | ✓            |
| Body composition (BIA)<br>Fat mass, skeletal muscle mass                                                                                                                                                                                                                                                                                                                                                     | ✓          | ✓           | ✓            |
| <b>Therapist and patient: telephone protocol and training diary</b>                                                                                                                                                                                                                                                                                                                                          |            |             |              |
| Weekly completed training (type, frequency and time)                                                                                                                                                                                                                                                                                                                                                         |            |             |              |
| Adverse events in connection with the training                                                                                                                                                                                                                                                                                                                                                               |            |             | Continuously |
| Weekly motivation of patients to exercise (4-point Likert scale)                                                                                                                                                                                                                                                                                                                                             |            |             |              |
| Weekly well-being of the patients (10-point Likert scale)                                                                                                                                                                                                                                                                                                                                                    |            |             |              |

2  
3 Abbreviations: FU, Follow-up; QLQ-C30, Quality of Life questionnaire of cancer patients of European  
4 Organization for Research and Treatment of Cancer; H&N35, Quality of Life questionnaire modul of  
5 head and neck cancer patients; GSLTPAQ, Godin-Shephard Leisure-Time Physical Activity  
6 Questionnaire; ROM, range of motion; SPPB, Short Physical Performance Battery; 6MWT, six-minute-  
7 walk-test; RPE, Rating of perceived exertion; CR-10, Category-Ratio-10 scale (0 = no pain at all, 10 =  
8 extremely intense pain); BIA, bioimpedance analysis

9

10

## 1 **Statistical considerations**

### 2 **Estimation of sample size**

3 The sample size calculation for the trial (phase B) is based on the results of Felser et al. (28): global  
4 QoL pre:  $50.1 \pm 16.4$ ; post:  $58.3 \pm 16.2$ ;  $r = 0.618$  resulting in an effect size of 0.5755, which is detectable  
5 on a confidence level of  $1 - \alpha = .95$  (2-sided) with  $n = 42$  patients (nQuery® Advisor 7.0 Statistical  
6 Solutions Ltd., Boston, MA, USA). Assuming a 20% dropout rate based on our experience, a total of  
7  $N = 53$  patients is required to be included in the study.

8

### 9 **Statistical analysis**

10 Quantitative variables (i.e. QoL) are presented as mean  $\pm$  standard deviation or as median (Q1, Q3),  
11 ranging from minimum to maximum (min to max); qualitative ones as relative frequency of their  
12 occurrence % and absolute (n). Missing data are indicated but not included in the calculation of  
13 percentage. The normal distribution of the data is checked using the Shapiro-Wilk test.

14 *Data analysis phase A:* The estimated dropout rate is given with the respective 95% confidence interval  
15 (95%CI) for feasibility. Further outcomes are patient characteristics, the completed training volume,  
16 adverse events associated with the training, satisfaction with the training information, use of the exercise  
17 materials and the influence of the weekly telephone calls during the intervention phase on motivation.

18 *Data analysis phase B:* QoL, physical activity level, physical functionality and body composition will  
19 be measured at three time points (pre, post, FU). Subgroup analyses are planned according to the patient  
20 characteristics, including men vs. women, sports beginners vs. PwHNC with sports experience, low vs.  
21 high physical performance/ physical activity level/ QoL and centres. Differences in means between time  
22 points and groups are analysed by using repeated measures analysis of variance. Correlation analyses  
23 are carried out to examine the strength and direction of relationships between quantitative variables.  
24 Regression analysis will be used to quantify the influence of predictors on QoL or physical function  
25 (flexibility, fall risk, aerobic performance) in a multiple approach.

26 A  $p$ -value of  $<0.05$  is considered significant. All data will be analysed using IBM® SPSS®.

27

## 1 **Patient involvement**

2 UMR's clinic III works closely with the local self-help group and the German self-help network Kopf-  
3 Hals-M.U.N.D.-Krebs e. V. to educate PwHNC and their families about physical activity and sports.  
4 The local self-help group contributed from the beginning to the design and implementation of the OSHO  
5 #94 study by helping to create the exercise manual (29) and videos. Both the local self-help group and  
6 the self-help network Kopf-Hals-M.U.N.D.-Krebs e. V. inform PwHNC about OSHO #94 via social  
7 media and information events. On patient days, study participants report on their experiences with the  
8 exercise program, and interim results are presented and discussed together.

9

## 10 **Ethics and Dissemination**

11 The study protocol (version 1 from September 30, 2020) was approved by the Ethic Committee of the  
12 University of Rostock (A2020-0274, October 26, 2020). Version 2 from June, 13, 2022 and version 3  
13 from July, 19, 2022 was approved by the Ethics Committee of the University of Halle-Wittenberg (2022-  
14 067, June 30, 2022) and University of Greifswald (BB 117/22, September 13, 2022). Three protocol  
15 modifications have been made and approved so far. These included the extension of the recruitment  
16 period twice (amendments from December 2021, and March 2024), the inclusion of PwHNC under  
17 palliative care (amendment from July 2022), and the change of deputy study leader (amendment from  
18 March 2024). The study was carried out in accordance with the Declaration of Helsinki and is registered  
19 at the German Clinical Trials Register (DRKS00023883). All participants will have to sign and date an  
20 informed consent form. The findings will be disseminated in peer-reviewed journals and academic  
21 conferences.

22

## 23 **Results of feasibility (phase A)**

24 Between January 2021 and February 2023, 25 PwHNC were included in the study. The proportion of  
25 men was 52% (n = 13). The median age was 66 (61, 72), ranging from 20 to 85 years. A higher education  
26 degree (>10 years) was held by 60% (n = 15) of the participants, 56% (n = 14) were non-smokers and  
27 72% (n = 18) stated that they had been active in sports before the disease. The most common tumour

1 location was the oropharynx (32%, n = 8), followed by the oral cavity (28%, n = 7). Participants were  
2 first diagnosed between 2006 and 2022. At the time of study participation, 92% (n = 23) were in  
3 complete remission. Further details on the socio-demographic, lifestyle and clinical data of the study  
4 participants can be found in Table 2.



1 **Table 2. Sociodemographic and clinical data (n = 25)**

| Patients characteristics                 | Category                       | Values            |
|------------------------------------------|--------------------------------|-------------------|
| Gender                                   | Women                          | 12 (48%)          |
|                                          | Men                            | 13 (52%)          |
| Age [years]                              |                                | 66 (61, 72)       |
| Body Mass Index [kg/m <sup>2</sup> ]     |                                | 23.8 (21.3, 26.6) |
| School education [years]                 | <10                            | 5 (20%)           |
|                                          | 10                             | 5 (20%)           |
|                                          | >10                            | 15 (60%)          |
| Family status                            | Single                         | 8 (32%)           |
|                                          | Married/ living with a partner | 17 (68%)          |
| Professional status                      | Working                        | 4 (16%)           |
|                                          | Retired                        | 20 (80%)          |
|                                          | Other                          | 1 (4%)            |
| Tobacco consumption                      | Smoker                         | 2 (8%)            |
|                                          | Ex-Smoker                      | 9 (36%)           |
|                                          | Non-Smoker                     | 14 (56%)          |
| Current alcohol consumption              | Yes                            | 17 (68%)          |
|                                          | No                             | 8 (32%)           |
| Active in sports before cancer diagnosis | Yes                            | 18 (72%)          |
|                                          | No                             | 7 (28%)           |
| Time after initial diagnosis [months]    |                                | 36 (15, 99)       |
| Tumour location                          | Oropharynx                     | 8 (32%)           |
|                                          | Mouth cavity                   | 7 (28%)           |
|                                          | Others                         | 10 (40%)          |
| Cancer stage                             | I                              | 8 (32%)           |
|                                          | II                             | 2 (8%)            |
|                                          | III                            | 5 (20%)           |
|                                          | IV                             | 10 (40%)          |
| Current therapy situation                | Complete remission             | 23 (92%)          |
|                                          | Under immunotherapy            | 1 (4%)            |
|                                          | Others*                        | 1 (4%)            |
| Treatment                                | Surgery only                   | 6 (24%)           |
|                                          | RT or RCT only                 | 3 (12%)           |
|                                          | Surgery and RT / RCT           | 16 (64%)          |

2  
3 Data are presented as the number of participants (%) for categorical variables and as median (Q1, Q3)  
4 for continuous variables.

5 Abbreviations: n, number of patients; RT, radiotherapy; RCT, combined radio-chemotherapy

6 \*Clinically tumour-free, positron emission tomography (PET)-CT still pending on inclusion

7  
8  
9

## 1 **Dropout rate**

2 A total of 22 out of 25 participants completed the intervention. Three participants (12%) discontinued  
3 the intervention prematurely for health reasons (operations, psychological stress due to unclear  
4 findings). Data from 21 participants were analysed due to the fact that one participant underwent surgery  
5 between the end of the intervention and post-examination, giving a dropout rate of 16% in phase A with  
6 95%CI [.016; .304].

## 8 **Secondary outcomes**

9 *Compliance with regard to training recommendations:* On average, the participants completed the  
10 individual exercise program 3.4 (2.5, 5.6) times per week, ranging from 1.3 to 6.8. The median training  
11 time was given as 98 (85, 150) min per week (35 to 304). Endurance training was completed an average  
12 of 2.8 (1.9, 4.9) times per week (0 to 6.7), with the median training time per week reaching 167 (86,  
13 247) min (0 to 497 min). Overall, the median weekly training time of the participants was 268 (210,  
14 328) min per week, ranging from 63 to 753 min per week.

15 *Adverse events:* A total of three participants (12%) reported adverse events that could be related to the  
16 exercise. One of these was pain in the Achilles tendon area, one patient complained of knee pain after  
17 the first training session and one patient reported pain in the shoulder.

18 *Satisfaction with the information about the training:* All patients (100%) stated that the information they  
19 received about the training was sufficient.

20 *Use of the exercise materials:* The exercise manual was used by 76% (n = 16) of the participants and  
21 the USB stick with the training videos by 62% (n = 13), with 32% (n = 8) stating that they used both.  
22 The small equipment (elastic band and inflatable exercise ball) was used by 86% (n = 18) of the  
23 participants.

24 *Influence of telephone calls on motivation to train:* A total of 86% (n = 18) of participants stated that  
25 the weekly calls from the therapists had a positive influence (29% very, 24% quite, 33% somewhat) on  
26 motivation to train.

27

## 1 Discussion

2 To our knowledge, the OSHO #94 study is the first study to investigate the short- and medium-term  
3 effects of 100% individualized home training in PwHNC after completion of cancer therapy or in a  
4 stable situation under immunotherapy. In contrast to previous studies (28, 43–61), participants do not  
5 receive an exercise program with defined FITT criteria (FITT frequency, intensity, time, type) that apply  
6 equally to all intervention participants, but rather exercise recommendations based on the current  
7 physical activity guidelines for cancer survivors (62). The participants can perform the endurance  
8 training according to their preferences, and the recommendations regarding strength and mobility are  
9 adapted to the individual's needs/deficits. OSHO #94 is thus pursuing the approach of transferring the  
10 knowledge previously generated primarily in randomized controlled trials (RCT) regarding the  
11 effectiveness of targeted exercise interventions in PwHNC (43, 45, 47–60, 63, 64) to 'real-world' care.  
12 The home-based training approach was chosen (i) because, in our view, it comes closest to the  
13 preferences of PwHNC (25–27). (ii) In addition, home-based training programs potentially offer all  
14 PwHNC the opportunity to participate, regardless of their place of residence. (iii) In contrast to  
15 temporary rehabilitation programs, home-based exercise programs can be continued indefinitely, which  
16 can increase QoL and physical activity levels not only in the short but also in the medium term. (iv) The  
17 recruiting centres (Rostock, Halle, Greifswald) are located in the northeast of Germany, a rather sparsely  
18 populated region with poor infrastructure. Specific exercise programs for people with cancer are scarce  
19 in this region, making it difficult to refer PwHNC to community-based programs. (v) Home exercise  
20 programs are cost-effective, as there are no membership fees and no travel costs, and they also relieve  
21 the burden on the healthcare system/caregiver. (vi) By eliminating the need to travel, home exercise  
22 programs are less time consuming and can potentially reduce barriers to exercise (23). Although home  
23 exercise programs for PwHNC offer various advantages over group training, feasibility, effectiveness  
24 and sustainability have been insufficiently studied, and further research, especially with greater attention  
25 to implementation science aspects, seems warranted.

26 Previous studies with home exercise approaches (65–67) and the feasibility results of OSHO #94 – low  
27 dropout and low number of reported adverse events – showed that the chosen home exercise approach  
28 is safe to implement. The dropout observed in the feasibility study was clearly below our expectations,

1 which were influenced by the results of Cnossen et al. (68). Among other things, the authors investigated  
2 the treatment adherence of PwHNC who participated in a guided home-based prophylactic exercise  
3 program during treatment. Adherence was 38% after 12 weeks. The authors saw the main reason for the  
4 decrease in adherence in the increasing negative effects of the treatment, which is only to be expected  
5 in exceptional cases due to the inclusion criteria in OSHO #94. Since the estimated dropout rate of the  
6 OSHO #94 phase A trial is identical to that of our initial study, which we conducted in a group setting,  
7 we consider the assumption of 20% dropout to be realistic. Therefore, we adjusted our original  
8 calculation of the sample size with a calculated dropout of 30% (N = 60 PwHNC) to 20% (N = 53  
9 PwHNC).

10 Although, in line with our expectations, the range in terms of training volume (frequency and time) in  
11 the feasibility phase is very large, the majority of the PwHNC included are adhering to the exercise  
12 recommendations or even exceeding them. One reason for this could lie in the included cohort itself, as  
13 the demographic data show that so far mainly PwHNC with a high level of education and a history of  
14 sport have been included. The fact that the willingness to participate in an exercise intervention is higher  
15 here is consistent with the results of Buffart et al. (69). In addition, it is well known that education/social  
16 status and health (behaviour) correlate with each other in the general population (70–72). Another reason  
17 could be the study design, which involves weekly telephone calls between therapists and study  
18 participants. According to the feasibility results, these telephone calls increase the motivation to exercise  
19 in four out of five participants. The results of the FU study will show the influence of the absence of  
20 telephone calls on physical activity. Conducting the FU study three months after the end of the  
21 intervention will allow an initial assessment of whether the guided home exercise program has an impact  
22 on the physical activity behaviour and QoL of PwHNC and can increase the physical activity level in  
23 the medium term.

24 Representatives of the target population were involved in the development of the OSHO #94 study by  
25 jointly developing and creating the exercise manual and the training videos. Since the small devices  
26 have also been used to a high degree by the current participants, it was decided that the study design  
27 would be adhered to, even if the demographic data/lifestyle parameters of the PwHNC included so far  
28 do not reflect the typical PwHNC (male, smoker, low level of education). As access to the study was  
29 deliberately chosen to be low-threshold – direct approach of the PwHNC or contact via telephone or

1 email from the patients, three on-site appointments over a period of six months with travel costs covered,  
2 no costs for materials and support – the results of the study will provide information on which PwHNC  
3 are addressed with the approach of guided home exercise.

4 The selected assessment in the OSHO #94 study corresponds to international standards and includes  
5 instruments that were/are regularly used in studies with PwHNC and thus enable comparability of the  
6 results. The EORTC QLQ-C30 is used to assess the primary outcome, the QoL, as recommended by  
7 Burgos-Mansilla et al. (17). This global instrument appears to be more sensitive to changes in general  
8 QoL than to more specific instruments. The GSLTPAQ, an instrument widely used in oncology research,  
9 is also used to record and classify physical activity. In accordance with the recommendations of  
10 Amireault et al. (36) the original form of the GSLTPAQ is used, and the LSI is used for interpretation.

11

## 12 **Limitations**

13 The design of the OSHO #94 study has some limitations, which are first related to the single-arm design,  
14 which does not allow a comparison of the results with a control group (usual care). Second, due to the  
15 diverse dissemination of information about the study at three study centres, via regional self-help groups  
16 as well as the Germany-wide patient network, social media and flyers, no statement on the recruitment  
17 rate is possible. In previous studies with PwHNC, recruitment rates ranged from 20% to 32.3% (17).  
18 With regard to recruitment, it should be mentioned that the number of recruiting centres is lower than  
19 originally planned due to the COVID-19 pandemic. As a result, recruitment is slower and the recruitment  
20 period had to be extended. Third, the LSI of the GSLTPAQ is used to interpret physical activity levels  
21 (36). Since PROs for physical activity only correspond to objective measurement data, for example, that  
22 collected with accelerometers, to a limited extent (73), this can lead to incorrect classifications of  
23 PwHNC. Since the GSLTPAQ is used at all three measurement times, it can be assumed that the ‘errors’  
24 are constant, and thus changes in the activity level can be reliably mapped. The OSHO #94 study will  
25 allow us to better understand the effectiveness of guided home exercise programs at the individual level  
26 and to evaluate processes to support future implementation and sustainability.

27

## 28 **Declarations**

## 1 **Acknowledgements**

2 Our greatest thanks go to the patients who helped to create the exercise manual and the videos. We  
3 would also like to thank the self-help network Kopf-Hals-M.U.N.D.-Krebs e. V. for promoting the  
4 study.

## 6 **Authors` contributions**

7 SF, ÄG, CJ and CGT developed the study concept and protocol. SF, CJ and CGT contributed to the  
8 acquisition of funding. SF, JR, LAB, DFS, JS, SS, MB, UK and CGT will oversee the implementation  
9 of the protocol and contribute to the acquisition, analysis and interpretation of data. SF, ÄG and CGT  
10 drafted the manuscript; JR, LAB and UK contributed to revisions and DFS, JS, SS, MB and CJ approved  
11 the final manuscript.

## 13 **Competing interests**

14 The authors declare that they have no competing interests.

## 16 **Data availability statement**

17 The study protocol and the raw data will be made available by the authors without reservation after  
18 completion of the study.

## 20 **Funding**

21 This work was supported by the East German Study Group Hematology and Oncology ([https://osho-](https://osho-studiengruppe.de/)  
22 [studiengruppe.de/](https://osho-studiengruppe.de/)) grant number OSHO #94. The funder played no role in the study design, data  
23 collection and analysis, decision to publish, or preparation of the manuscript.

24

## 1 Literature Cited

- 2 1. Riechelmann H, Dejado D, Steinbichler TB, Lettenbichler-Haug A, Anegg M, Ganswindt U et al.  
3 Functional Outcomes in Head and Neck Cancer Patients. *Cancers (Basel)* 2022; 14(9).
- 4 2. Lo Nigro C, Denaro N, Merlotti A, Merlano M. Head and neck cancer: improving outcomes with a  
5 multidisciplinary approach. *Cancer Manag Res* 2017; 9:363–71.
- 6 3. Ortiz-Comino L, Fernández-Lao C, Speksnijder CM, Lozano-Lozano M, Tovar-Martín I, Arroyo-  
7 Morales M et al. Upper body motor function and swallowing impairments and its association in  
8 survivors of head and neck cancer: A cross-sectional study. *PLoS ONE* 2020; 15(6):e0234467.
- 9 4. van Hinte G, Leijendekkers RA, Merckx MAW, Takes RP, Nijhuis-van der Sanden MWG, Speksnijder  
10 CM. Identifying unmet needs and limitations in physical health in survivors of Head and Neck Cancer.  
11 *Eur J Cancer Care (Engl)* 2021; 30(5):e13434.
- 12 5. Baxi SS, Schwitzer E, Jones LW. A review of weight loss and sarcopenia in patients with head and  
13 neck cancer treated with chemoradiation. *Cancers Head Neck* 2016; 1(1):5.
- 14 6. Ellis MA, Sterba KR, Brennan EA, Maurer S, Hill EG, Day TA et al. A Systematic Review of Patient-  
15 Reported Outcome Measures Assessing Body Image Disturbance in Patients with Head and Neck  
16 Cancer. *Otolaryngol Head Neck Surg* 2019; 160(6):941–54.
- 17 7. Couch M, Lai V, Cannon T, Guttridge D, Zanation A, George J et al. Cancer cachexia syndrome in  
18 head and neck cancer patients: part I. Diagnosis, impact on quality of life and survival, and treatment.  
19 *Head Neck* 2007; 29(4):401–11.
- 20 8. Epstein JB, Robertson M, Emerton S, Phillips N, Stevenson-Moore P. Quality of life and oral  
21 function in patients treated with radiation therapy for head and neck cancer. *Head Neck* 2001;  
22 23(5):389–98.
- 23 9. Langendijk JA, Doornaert P, Verdonck-de Leeuw IM, Leemans CR, Aaronson NK, Slotman BJ. Impact  
24 of late treatment-related toxicity on quality of life among patients with head and neck cancer treated  
25 with radiotherapy. *Journal of clinical oncology* 2008; 26(22):3770–6.
- 26 10. Chow LQM. Head and Neck Cancer. *The new england journal of medicine* 2020; 382(1):60–72.
- 27 11. León X, Orús C, Casasayas M, Neumann E, Holgado A, Quer M. Trends in disease-specific survival  
28 of head and neck squamous cell carcinoma patients treated in a single institution over a 30-year  
29 period. *Oral Oncol* 2021; 115:105184.
- 30 12. Ferris RL, Blumenschein G, Fayette J, Guigay J, Colevas AD, Licitra L et al. Nivolumab for Recurrent  
31 Squamous-Cell Carcinoma of the Head and Neck. *N Engl J Med* 2016; 375(19):1856–67.
- 32 13. Ringash J, Bernstein LJ, Devins G, Dunphy C, Giuliani M, Martino R et al. Head and Neck Cancer  
33 Survivorship: Learning the Needs, Meeting the Needs. *Semin Radiat Oncol* 2018; 28(1):64–74.
- 34 14. Margalit DN, Salz T, Venchiarutti R, Milley K, McNamara M, Chima S et al. Interventions for head  
35 and neck cancer survivors: Systematic review. *Head Neck* 2022; 44(11):2579–99.
- 36 15. Burgos-Mansilla B, Galiano-Castillo N, Lozano-Lozano M, Fernández-Lao C, Lopez-Garzon M,  
37 Arroyo-Morales M. Effect of Physical Therapy Modalities on Quality of Life of Head and Neck Cancer  
38 Survivors: A Systematic Review with Meta-Analysis. *J Clin Med* 2021; 10(20).

- 1 16. Pérez IMM, Pérez SEM, García RP, Luggens DdZ, Martínez GB, González CR et al. Exercise-based  
2 rehabilitation on functionality and quality of life in head and neck cancer survivors. A systematic  
3 review and meta-analysis. *Sci Rep* 2023; 13(1):8523.
- 4 17. Avancini A, Borsati A, Belluomini L, Giannarelli D, Nocini R, Insolda J et al. Effect of exercise across  
5 the head and neck cancer continuum: a systematic review of randomized controlled trials. *Support*  
6 *Care Cancer* 2023; 31(12):670.
- 7 18. Bye A, Sandmael JA, Stene GB, Thorsen L, Balstad TR, Solheim TS et al. Exercise and Nutrition  
8 Interventions in Patients with Head and Neck Cancer during Curative Treatment: A Systematic  
9 Review and Meta-Analysis. *Nutrients* 2020; 12(11).
- 10 19. Capozzi LC, Nishimura KC, McNeely ML, Lau H, Culos-Reed SN. The impact of physical activity on  
11 health-related fitness and quality of life for patients with head and neck cancer: a systematic review.  
12 *Br J Sports Med* 2016; 50(6):325–38.
- 13 20. Goyal N, Day A, Epstein J, Goodman J, Graboyes E, Jalisi S et al. Head and neck cancer survivorship  
14 consensus statement from the American Head and Neck Society. *Laryngoscope Investig Otolaryngol*  
15 2022; 7(1):70–92.
- 16 21. Fang Y-Y, Wang C-P, Chen Y-J, Lou P-J, Ko J-Y, Lin J-J et al. Physical activity and fitness in survivors  
17 of head and neck cancer. *Support Care Cancer* 2021; 29(11):6807–17.
- 18 22. Karczewska-Lindinger M, Tuomi L, Fridolfsson J, Arvidsson D, Börjesson M, Finizia C. Low physical  
19 activity in patients diagnosed with head and neck cancer. *Laryngoscope Investig Otolaryngol* 2021;  
20 6(4):747–55.
- 21 23. Ning Y, Wang Q, Ding Y, Zhao W, Jia Z, Wang B. Barriers and facilitators to physical activity  
22 participation in patients with head and neck cancer: a scoping review. *Support Care Cancer* 2022;  
23 30(6):4591–601.
- 24 24. Doughty HC, Hill RA, Riley A, Midgley AW, Patterson JM, Boddy LM et al. Barriers to and  
25 facilitators of physical activity in adults living with and beyond cancer, with special emphasis on head  
26 and neck cancer: a systematic review of qualitative and mixed methods studies. *Support Care Cancer*  
27 2023; 31(8):471.
- 28 25. Midgley AW, Lowe D, Levy AR, Mepani V, Rogers SN. Exercise program design considerations for  
29 head and neck cancer survivors. *European archives of oto-rhino-laryngology* 2018; 275(1):169–79.
- 30 26. Rogers LQ, Malone J, Rao K, Courneya KS, Fogleman A, Tippey A et al. Exercise preferences among  
31 patients with head and neck cancer: prevalence and associations with quality of life, symptom  
32 severity, depression, and rural residence. *Head Neck* 2009; 31(8):994–1005.
- 33 27. Jackson C, Dowd AJ, Capozzi LC, Bridel W, Lau HY, Culos-Reed SN. A turning point: Head and neck  
34 cancer patients' exercise preferences and barriers before and after participation in an exercise  
35 intervention. *Eur J Cancer Care (Engl)* 2018; 27(2):e12826.
- 36 28. Felser S, Behrens M, Strüder D, Liese J, Rohde K, Junghanss C et al. Feasibility and Effects of a  
37 Supervised Exercise Program Suitable for Independent Training at Home on Physical Function and  
38 Quality of Life in Head and Neck Cancer Patients: A Pilot Study. *Integr Cancer Ther* 2020; 19:1-12.  
39 Available from: URL:.
- 40 29. Felser S, editor. *Übungshandbuch für Patienten mit Mund-, Kiefer-, Gesichts- und Halstumoren*.  
41 Rostock; 2019.



- 1 30. Borg GA. Psychophysical bases of perceived exertion. *Med Sci Sports Exerc* 1982; 14(5):377–81.
- 2 31. Bjordal K, Graeff A de, Fayers PM, Hammerlid E, van Pottelsberghe C, Curran D et al. A 12 country  
3 field study of the EORTC QLQ-C30 (version 3.0) and the head and neck cancer specific module (EORTC  
4 QLQ-H&N35) in head and neck patients. *European Journal of Cancer* 2000; 36:1796-1807.
- 5 32. Aaronson NK, Ahmedzai S, Bergman B, Bullinger M, Cull A, Duez NJ et al. The European  
6 Organization for Research and Treatment of Cancer QLQ-C30: a quality-of-life instrument for use in  
7 international clinical trials in oncology. *J Natl Cancer Inst* 1993; 85(5):365–76.
- 8 33. Fayers PM. Interpreting quality of life data: population-based reference data for the EORTC QLQ-  
9 C30. *European Journal of Cancer* 2001; 37(11):1331–4.
- 10 34. Singer S, Araújo C, Arraras JI, Baumann I, Boehm A, Brokstad Herlofson B et al. Measuring quality  
11 of life in patients with head and neck cancer: Update of the EORTC QLQ-H&N Module, Phase III. *Head  
12 Neck* 2015; 37(9):1358–67.
- 13 35. Amireault S, Godin G. The Godin-Shephard leisure-time physical activity questionnaire: validity  
14 evidence supporting its use for classifying healthy adults into active and insufficiently active  
15 categories. *Percept Mot Skills* 2015; 120(2):604–22.
- 16 36. Amireault S, Godin G, Lacombe J, Sabiston CM. The use of the Godin-Shephard Leisure-Time  
17 Physical Activity Questionnaire in oncology research: a systematic review. *BMC Med Res Methodol*  
18 2015; 15:60.
- 19 37. Godin G. The Godin-Shephard Leisure-Time Physical Activity Questionnaire. *The Health & Fitness  
20 Journal of Canada* 2011; 4(1):18–22.
- 21 38. Mâsse LC, Niet JE de. Sources of validity evidence needed with self-report measures of physical  
22 activity. *J Phys Act Health* 2012; 9 Suppl 1:S44-55.
- 23 39. Holt LE, Pelham TW, Burke DG. Modifications to the Standard Sit-and-Reach Flexibility Protocol. *J  
24 Athl Train* 1999; 34(1):43–7.
- 25 40. Guralnik JM, Ferrucci L, Pieper CF, Leveille SG, Markides KS, Ostir GV et al. Lower extremity  
26 function and subsequent disability: consistency across studies, predictive models, and value of gait  
27 speed alone compared with the short physical performance battery. *J Gerontol A Biol Sci Med Sci*  
28 2000; 55(4):M221-31.
- 29 41. Schmidt K, Vogt L, Thiel C, Jäger E, Banzer W. Validity of the six-minute walk test in cancer  
30 patients. *Int J Sports Med* 2013; 34(7):631–6.
- 31 42. Borg E, Borg G, Larsson K, Letzter M, Sundblad B-M. An index for breathlessness and leg fatigue.  
32 *Scand J Med Sci Sports* 2010; 20(4):644–50.
- 33 43. Bragante KC, Groisman S, Carboni C, Baiocchi JMT, da Motta NW, Silva MF et al. Efficacy of  
34 exercise therapy during radiotherapy to prevent reduction in mouth opening in patients with head  
35 and neck cancer: A randomized controlled trial. *Oral Surg Oral Med Oral Pathol Oral Radiol* 2020;  
36 129(1):27–38.
- 37 44. Capozzi LC, Boldt KR, Lau H, Shirt L, Bultz B, Culos-Reed SN. A clinic-supported group exercise  
38 program for head and neck cancer survivors: managing cancer and treatment side effects to improve  
39 quality of life. *Sports medicine* 2015; 23(4):1001–7.

- 1 45. Capozzi LC, McNeely ML, Lau HY, Reimer RA, Giese-Davis J, Fung TS et al. Patient-reported  
2 outcomes, body composition, and nutrition status in patients with head and neck cancer: Results  
3 from an exploratory randomized controlled exercise trial. *Cancer* 2016; 122(8):1185–200.
- 4 46. Crevenna R, Schneider B, Mittermaier C, Keilani M, Zöch C, Nuhr M et al. Implementation of the  
5 Vienna Hydrotherapy Group for Laryngectomees--a pilot study. *Support Care Cancer* 2003;  
6 11(11):735–8.
- 7 47. Dotevall H, Tuomi L, Petersson K, Löfhede H, Bergquist H, Finizia C. Treatment with head-lift  
8 exercise in head and neck cancer patients with dysphagia: results from a randomized, controlled trial  
9 with flexible endoscopic evaluation of swallowing (FEES). *Support Care Cancer* 2022; 31(1):56.
- 10 48. Grote M, Maihöfer C, Weigl M, Davies-Knorr P, Belka C. Progressive resistance training in  
11 cachectic head and neck cancer patients undergoing radiotherapy: a randomized controlled pilot  
12 feasibility trial. *Radiat Oncol* 2018; 13(1):215.
- 13 49. Hajdú SF, Wessel I, Dalton SO, Eskildsen SJ, Johansen C. Swallowing Exercise During Head and  
14 Neck Cancer Treatment: Results of a Randomized Trial. *Dysphagia* 2022; 37(4):749–62.
- 15 50. Lin K-Y, Cheng H-C, Yen C-J, Hung C-H, Huang Y-T, Yang H-L et al. Effects of Exercise in Patients  
16 Undergoing Chemotherapy for Head and Neck Cancer: A Pilot Randomized Controlled Trial. *Int J*  
17 *Environ Res Public Health* 2021; 18(3).
- 18 51. Loh E-W, Shih H-F, Lin C-K, Huang T-W. Effect of progressive muscle relaxation on postoperative  
19 pain, fatigue, and vital signs in patients with head and neck cancers: A randomized controlled trial.  
20 *Patient Educ Couns* 2022; 105(7):2151–7.
- 21 52. Lønbro S, Dalgas U, Primdahl H, Johansen J, Nielsen JL, Aagaard P et al. Progressive resistance  
22 training rebuilds lean body mass in head and neck cancer patients after radiotherapy--results from  
23 the randomized DAHANCA 25B trial. *Radiother Oncol* 2013; 108(2):314–9.
- 24 53. Lønbro S, Dalgas U, Primdahl H, Overgaard J, Overgaard K. Feasibility and efficacy of progressive  
25 resistance training and dietary supplements in radiotherapy treated head and neck cancer patients-  
26 the DAHANCA 25A study. *Acta oncologica* 2013; 52(2):310–8.
- 27 54. McGarvey AC, Hoffman GR, Osmotherly PG, Chiarelli PE. Maximizing shoulder function after  
28 accessory nerve injury and neck dissection surgery: A multicenter randomized controlled trial. *Head*  
29 *Neck* 2015; 37(7):1022–31.
- 30 55. McNeely ML, Parliament M, Courneya KS, Seikaly H, Jha N, Scrimger R et al. A pilot study of a  
31 randomized controlled trial to evaluate the effects of progressive resistance exercise training on  
32 shoulder dysfunction caused by spinal accessory neurapraxia/neurectomy in head and neck cancer  
33 survivors. *Head Neck* 2004; 26(6):518–30.
- 34 56. McNeely ML, Parliament MB, Seikaly H, Jha N, Magee DJ, Haykowsky MJ et al. Effect of exercise  
35 on upper extremity pain and dysfunction in head and neck cancer survivors: a randomized controlled  
36 trial. *Cancer* 2008; 113(1):214–22.
- 37 57. Rogers LQ, Anton PM, Fogleman A, Hopkins-Price P, Verhulst S, Rao K et al. Pilot, randomized trial  
38 of resistance exercise during radiation therapy for head and neck cancer. *Head Neck* 2013;  
39 35(8):1178–88.

- 1 58. Samuel SR, Maiya GA, Babu AS, Vidyasagar MS. Effect of exercise training on functional capacity  
2 & quality of life in head & neck cancer patients receiving chemoradiotherapy. *Indian J Med Res* 2013;  
3 137(3):515–20.
- 4 59. Thomas A, D’Silva C, Mohandas L, Pais SMJ, Samuel SR. Effect of Muscle Energy Techniques V/S  
5 Active Range of Motion Exercises on Shoulder Function Post Modified Radical Neck Dissection in  
6 patients with Head and Neck Cancer - A Randomized Clinical Trial. *Asian Pac J Cancer Prev* 2020;  
7 21(8):2389–93.
- 8 60. Valkenet K, Trappenburg JCA, Ruurda JP, Guinan EM, Reynolds JV, Nafteux P et al. Multicentre  
9 randomized clinical trial of inspiratory muscle training versus usual care before surgery for  
10 oesophageal cancer. *Br J Surg* 2018; 105(5):502–11.
- 11 61. Zhao SG, Alexander NB, Djuric Z, Zhou J, Tao Y, Schipper M et al. Maintaining physical activity  
12 during head and neck cancer treatment: Results of a pilot controlled trial. *Head Neck* 2016; 38 Suppl  
13 1:E1086-96.
- 14 62. Campbell KL, Winters-Stone KM, Wiskemann J, May AM, Schwartz AL, Courneya KS et al. Exercise  
15 Guidelines for Cancer Survivors: Consensus Statement from International Multidisciplinary  
16 Roundtable. *Med Sci Sports Exerc* 2019; 51(11):2375–90.
- 17 63. Su T-L, Chen A-N, Leong C-P, Huang Y-C, Chiang C-W, Chen I-H et al. The effect of home-based  
18 program and outpatient physical therapy in patients with head and neck cancer: A randomized,  
19 controlled trial. *Oral Oncol* 2017; 74:130–4.
- 20 64. Hong Y-L, Hsieh T-C, Chen P-R, Chang S-C. Nurse-Led Counseling Intervention of Postoperative  
21 Home-Based Exercise Training Improves Shoulder Pain, Shoulder Disability, and Quality of Life in  
22 Newly Diagnosed Head and Neck Cancer Patients. *J Clin Med* 2022; 11(14).
- 23 65. Kok A, Passchier E, May AM, van den Brekel MWM, Jager-Wittenaar H, Veenhof C et al. Feasibility  
24 of a supervised and home-based tailored exercise intervention in head and neck cancer patients  
25 during chemoradiotherapy. *Eur J Cancer Care (Engl)* 2022; 31(6):e13662.
- 26 66. Cnossen IC, van Uden-Kraan CF, Rinkel RNPM, Aalders IJ, Goede CJT de, Bree R de et al.  
27 Multimodal guided self-help exercise program to prevent speech, swallowing, and shoulder problems  
28 among head and neck cancer patients: a feasibility study. *J Med Internet Res* 2014; 16(3):e74.
- 29 67. Eades M, Murphy J, Carney S, Amdouni S, Lemoignan J, Jelowicki M et al. Effect of an  
30 interdisciplinary rehabilitation program on quality of life in patients with head and neck cancer:  
31 review of clinical experience. *Head Neck* 2013; 35(3):343–9.
- 32 68. Cnossen IC, van Uden-Kraan CF, Witte BI, Aalders YJ, Goede CJT de, Bree R de et al. Prophylactic  
33 exercises among head and neck cancer patients during and after swallowing sparing intensity  
34 modulated radiation: adherence and exercise performance levels of a 12-week guided home-based  
35 program. *Eur Arch Otorhinolaryngol* 2017; 274(2):1129–38.
- 36 69. Buffart LM, Bree R de, Altena M, van der Werff S, Drossaert CHC, Speksnijder CM et al.  
37 Demographic, clinical, lifestyle-related, and social-cognitive correlates of physical activity in head and  
38 neck cancer survivors. *Support Care Cancer* 2018; 26(5):1447–56.
- 39 70. Hannover B, Kleiber D. Gesundheit und Bildung. In: Tippelt R, Schmidt-Hertha B, editors.  
40 *Handbuch Bildungsforschung*. Wiesbaden: Springer Fachmedien Wiesbaden; 2016. p. 1–16.

- 1 71. Raghupathi V, Raghupathi W. The influence of education on health: an empirical assessment of  
2 OECD countries for the period 1995–2015. *Archives of public health* 2020; 78(1):1–18.
- 3 72. Zajacova A, Lawrence EM. The Relationship Between Education and Health: Reducing Disparities  
4 Through a Contextual Approach. *Annu Rev Public Health* 2018; 39:273–89.
- 5 73. Douma JAJ, Beaufort MB de, Kampshoff CS, Persoon S, Vermaire JA, Chinapaw MJ et al. Physical  
6 activity in patients with cancer: self-report versus accelerometer assessments. *Support Care Cancer*  
7 2020; 28(8):3701–9.

Figure 1 SPIRIT schedule of enrolment, interventions, and assessments

| TIMEPOINT                                                             | Study Period |            |                          |                                              |                                                    |
|-----------------------------------------------------------------------|--------------|------------|--------------------------|----------------------------------------------|----------------------------------------------------|
|                                                                       | Enrolment    | Allocation | Post-allocation          |                                              |                                                    |
|                                                                       | $-t_0$       | 0          | $t_1$<br>Pre<br>(week 0) | $t_2$<br>Post<br>(week 12 to a<br>max of 16) | $t_3$<br>Follow up<br>(week 24 to a<br>max. of 30) |
| <b>ENROLMENT:</b>                                                     |              |            |                          |                                              |                                                    |
| Eligibility screen                                                    | X            |            |                          |                                              |                                                    |
| Informed consent                                                      | X            |            |                          |                                              |                                                    |
| Allocation                                                            |              | X          |                          |                                              |                                                    |
| <b>INTERVENTIONS:</b>                                                 |              |            |                          |                                              |                                                    |
| <i>Home-based exercise Intervention</i>                               |              |            | ←————→                   |                                              |                                                    |
| <b>ASSESSMENTS:</b>                                                   |              |            |                          |                                              |                                                    |
| <i>Disease-specific data</i>                                          | X            |            |                          |                                              |                                                    |
| <i>Sociodemographic data and lifestyle factors</i>                    |              |            | X                        |                                              |                                                    |
| <i>Quality of life, level of physical activity, physical function</i> |              |            | X                        | X                                            | X                                                  |
| <i>Telephone protocol and training diary</i>                          |              |            | ←————→                   |                                              |                                                    |
| <i>Assessment of the intervention and support</i>                     |              |            |                          | X                                            |                                                    |

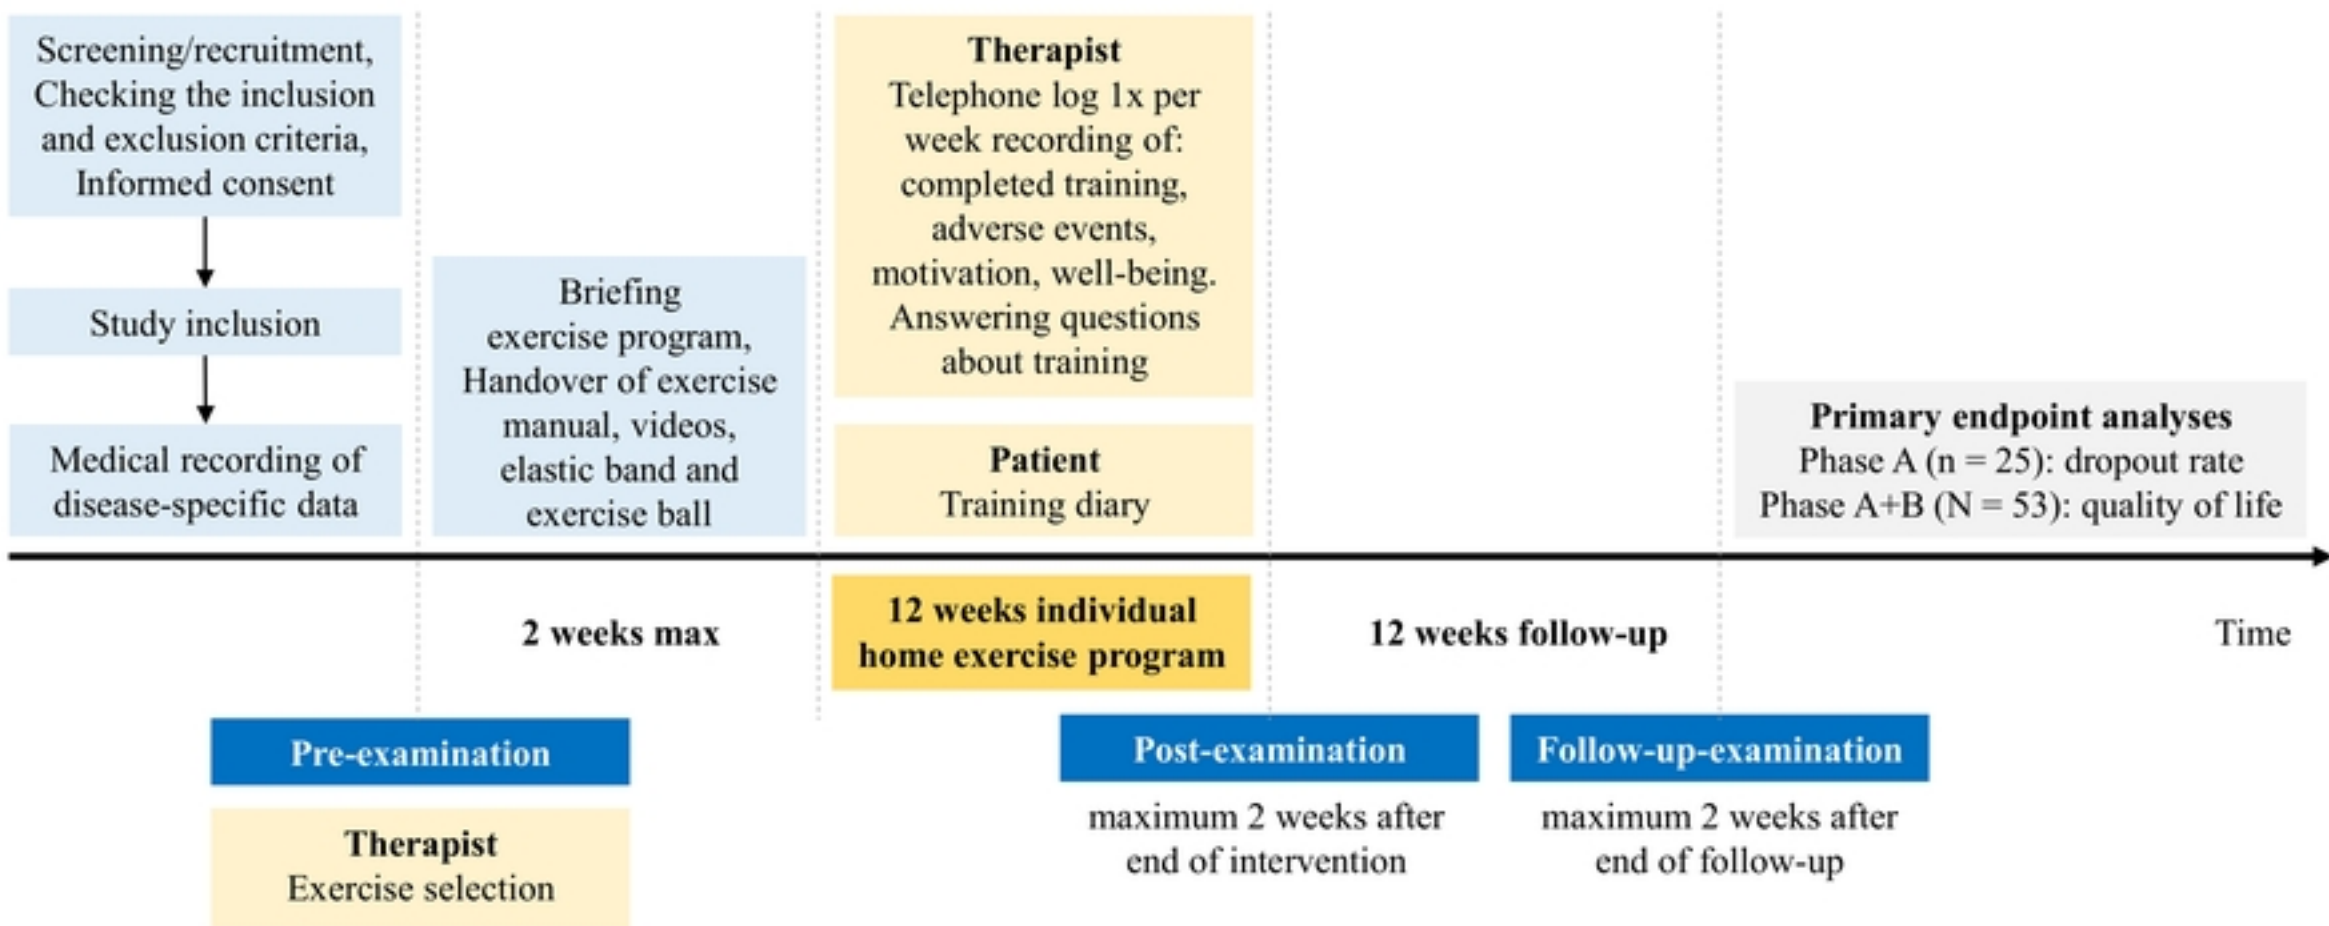

Figure
